# Supplementary material for: Water-induced helical supramolecular polymerization and gel formation of an alkylene-tethered perylene bisimide dyad
Source: Royal Society of Chemistry journal article supplement (doi:10.1039/c6cc08995j), 2016-11-28
Supplement: c6cc08995j1.pdf [file c6cc08995j1.pdf]

*Electronic Supplementary Information*

**Water-Induced Helical Supramolecular Polymerization and Gel Formation of  
Alkylene-Tethered Perylene Bisimide Dyad**

Xu Lin,<sup>a</sup> Hiroki Kurata,<sup>a</sup> Deepak D. Prabhu,<sup>a</sup> Mitsuaki Yamauchi,<sup>a</sup> Tomonori Ohba<sup>b</sup> and  
Shiki Yagai\*<sup>a</sup>

<sup>a</sup> Department of Applied Chemistry and Biotechnology, Graduate School of Engineering, Chiba University, 1-33 Yayoi-cho, Inage-ku, Chiba 263-8522, Japan.

<sup>b</sup> Department of Chemistry, Graduate School of Science, Chiba University, 1-33 Yayoi-cho, Inage-ku, Chiba 263-8522, Japan.

**Table of Contents**

|                                         |    |
|-----------------------------------------|----|
| 1. Materials and Methods .....          | 2  |
| 2. Synthesis and Characterization.....  | 3  |
| 3. Supplementary Figures and Table..... | 5  |
| 4. Supplementary References.....        | 11 |

## 1. Materials and Methods

All commercially available reagents and solvents were of reagent grade and used without further purification. NMR spectra were recorded on JEOL JNM-ECA500 NMR spectrometers and chemical shifts are reported in ppm ( $\delta$ ) with the signal of TMS as an internal standard. ESI-MS spectra were measured on an Exactive (Thermo Scientific). UV/Vis and fluorescence spectra were recorded on a JASCO V660 spectrophotometer and JASCO FP6600 spectrofluorometer, respectively. Fluorescence quantum yields were measured on Absolute PL Quantum Yield Measurement System C9920-02 (Hamamatsu Photonics). Circular dichroism (CD) and linear dichroism (LD) spectra were recorded on a JASCO J840 spectropolarimeter equipped. Powder X-ray diffraction analysis was carried out with a Rigaku Rint-2200 X-ray diffractometer with monochromated CuK $\alpha$  radiation ( $\lambda = 1.5418 \text{ \AA}$ ). All X-ray diffraction experiments were performed at room temperature. TEM observation was performed on JEM-2100F (JEOL) at acceleration voltage at 120 kV. The sample was prepared by spin-coating assembly solution onto carbon-coated formvar copper grid (200 mesh) and dried under vacuum for 24 h. AFM images were acquired under ambient conditions using Multimode 8 Nanoscope V (Bruker Instruments) in tapping mode. Silicon cantilevers (OMCL-AC240TS-C2) with a spring constant of 2 N/m and frequency of 70 kHz (nominal value, S2 Olympus, Japan) were used. The samples were prepared by spin-coating solution onto freshly cleaved highly-oriented pyrolytic graphite (HOPG). Rheological measurements were performed using the parallel plate geometry (DICOVERY HR-3, TA Instruments, USA) at 25 °C.

## 2. Synthesis and characterization

Perylene bisimide dyad **2** was prepared according to Scheme S1. Compounds **3**<sup>S1</sup>, **4**<sup>S2</sup> and **5**<sup>S3</sup> were prepared according to reported methods.

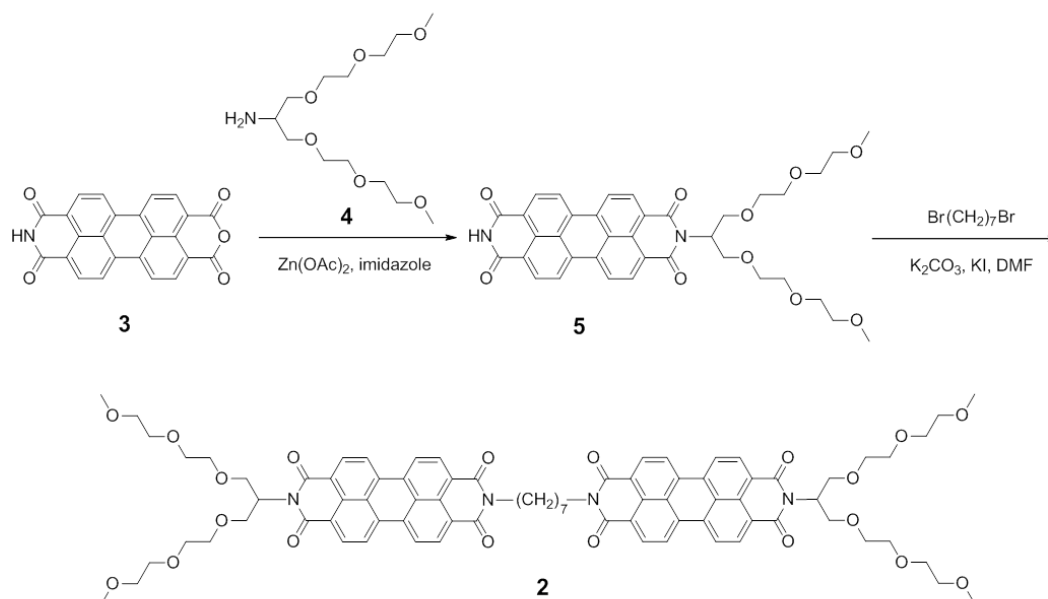

**Scheme S1.** Synthesis of perylene bisimide dyad **2**

A mixture of **5** (200 mg, 0.30 mmol), 1,7-dibromoheptane (41 mg, 0.15 mmol),  $\text{K}_2\text{CO}_3$  (74 mg, 0.54 mmol) and KI (10 mg, 0.06 mmol) in DMF (15 mL) was stirred for 5 h at 80 °C under  $\text{N}_2$  atmosphere. After the solution was cooled to room temperature, the solvent was removed under vacuum. The residue was purified by silica gel column chromatography (eluent: 5% methanol in chloroform) and GPC (eluent: chloroform) to give pure compound **2** as a red solid (61 mg, 28%).  $^1\text{H}$  NMR (500 MHz,  $\text{CDCl}_3$ )  $\delta$  = 8.33 (d,  $J$  = 7.9 Hz, 4H, ArH), 8.25 (d,  $J$  = 7.4 Hz, 4H, ArH), 8.05– 8.00 (m, 8H, ArH), 5.68–5.60 (m, 2H, 2N–CH–OEG), 4.23–4.15 (m, 8H, 2N– $\text{CH}_2$  and 2 $\alpha\text{OCH}_2$ –OEG), 4.00 (dd, 4H, 2 $\alpha\text{OCH}_2$ –OEG), 3.79–3.57 (m, 24H, 12 $\text{OCH}_2$ –OEG), 3.46–3.44 (m, 8H, 4 $\text{OCH}_2$ –OEG), 3.30 (s, 12H, 4 $\text{OCH}_3$ –OEG), 1.87–1.78 (m, 4H, 2 $\text{CH}_2$ ), 1.58–1.49 (m, 6H, 3 $\text{CH}_2$ ) ppm;  $^{13}\text{C}$  NMR (125 MHz,  $\text{CDCl}_3$ , 60 °C)  $\delta$  = 163.18, 162.74, 133.41, 133.27, 130.60, 130.53, 128.77, 128.59, 125.32, 125.21, 123.11, 122.91, 122.21, 122.17, 72.05, 70.65, 70.53, 70.48, 69.51, 58.89, 52.58, 40.60, 29.85, 28.13, 26.57 ppm; HRMS (ESI):  $m/z$  calcd for  $\text{C}_{81}\text{H}_{84}\text{N}_4\text{O}_{20}\text{Na}$

1455.5571 [M+Na]<sup>+</sup>, found 1455.5564.

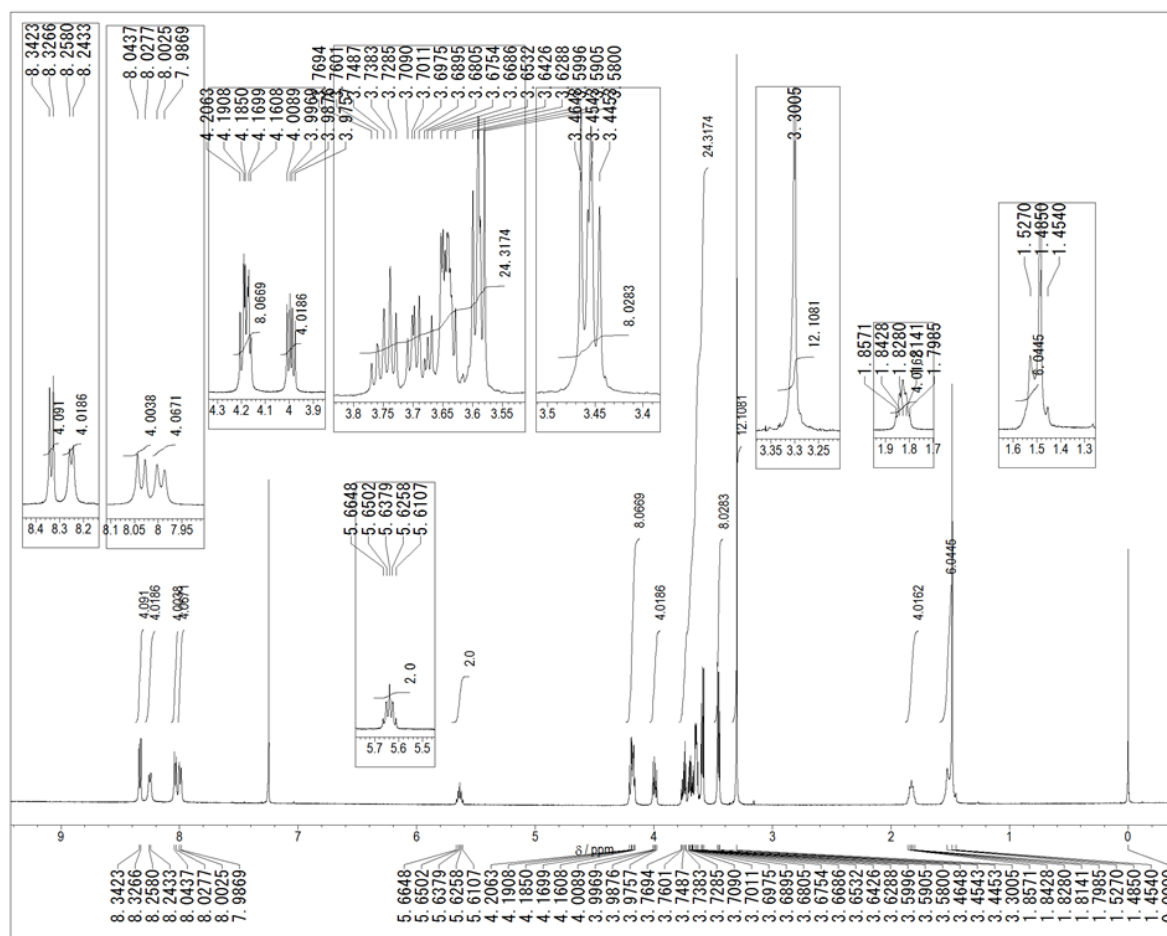

Chart S1 <sup>1</sup>H NMR spectrum of 2 in CDCl<sub>3</sub> at 293 K.

### 3. Supporting Figures

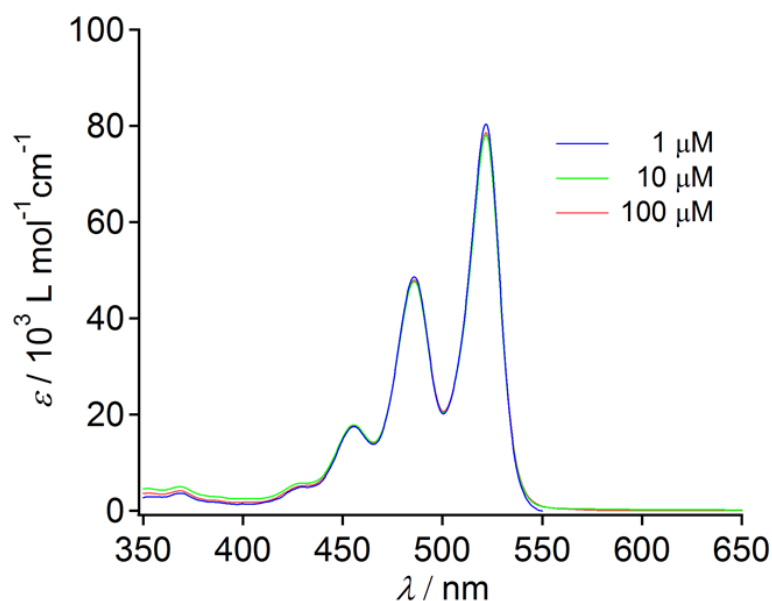

**Fig. S1** Concentration-dependent UV/Vis absorption spectra of **1** ( $c = 1 \times 10^{-6}$  to  $1 \times 10^{-4}$  M) in THF at 20 °C.

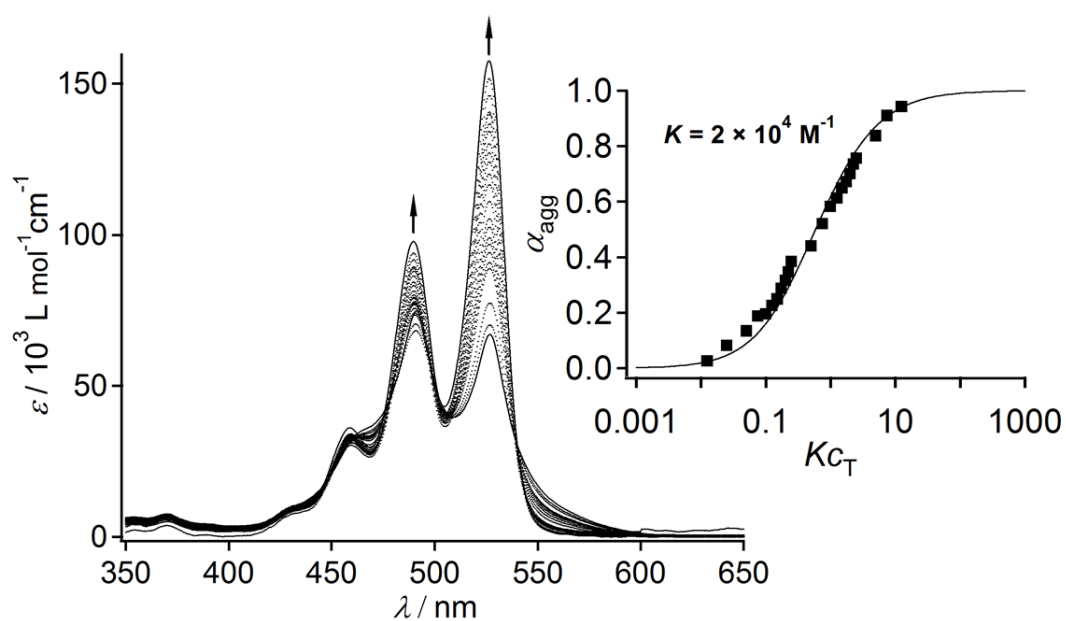

**Fig. S2** Concentration-dependent UV/Vis absorption spectra of **2** ( $c = 5 \times 10^{-7}$  to  $1 \times 10^{-3}$  M) in CHCl<sub>3</sub>/THF (8/2, v/v) mixture at 20 °C. Arrows indicate spectral change with decreasing concentration. Inset: plot of fraction of aggregated molecules ( $\alpha_{\text{agg}}$ ) of **2** calculated from apparent absorption intensity at  $\lambda = 522$  nm as a function of  $Kc_T$ . The solid line corresponds to the theoretical fit obtained by using isodesmic model.  $K$  denotes the association constant.

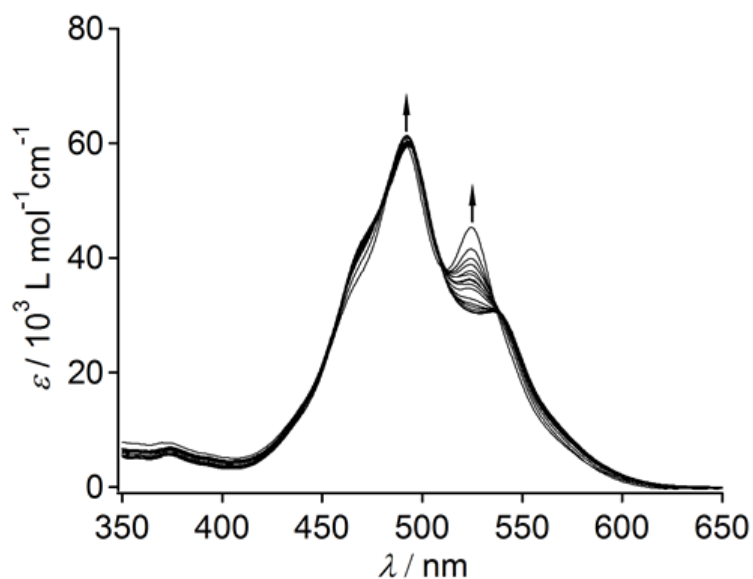

**Fig. S3** Concentration-dependent UV/Vis absorption spectra of **2** ( $c = 1 \times 10^{-6}$  to  $1 \times 10^{-4}$  M) in THF/water mixtures (80/20) at 20 °C. Arrows indicate the spectral changes with decreasing concentration.

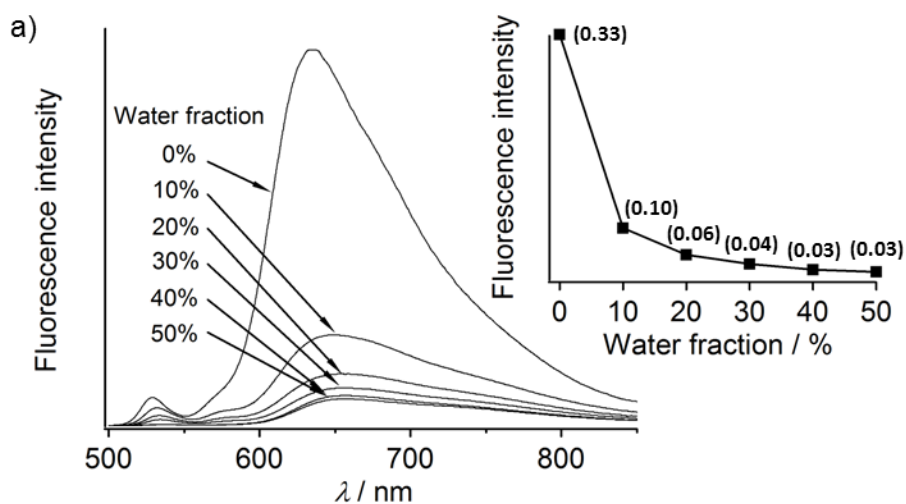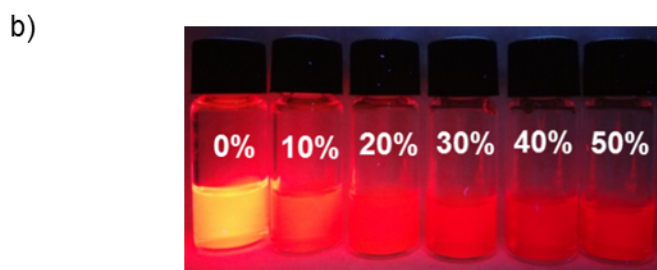

**Fig. S4** a) Fluorescence spectra of **2** ( $c = 1 \times 10^{-4}$  M,  $\lambda_{\text{ex}} = 470$  nm) in THF/water mixtures with different water content (0–50 v/v%). Inset: plots of the intensity of excimer-like fluorescence ( $\lambda_{\text{max}}$ ) as a function of different water content. Numbers in parentheses indicate the fluorescence quantum yield ( $\Phi_f$ ) of **2**. b) Photographs of dyad **2** ( $c = 1 \times 10^{-4}$  M) in THF/water mixture with different water content (0–50, v/v%) under UV-illumination.

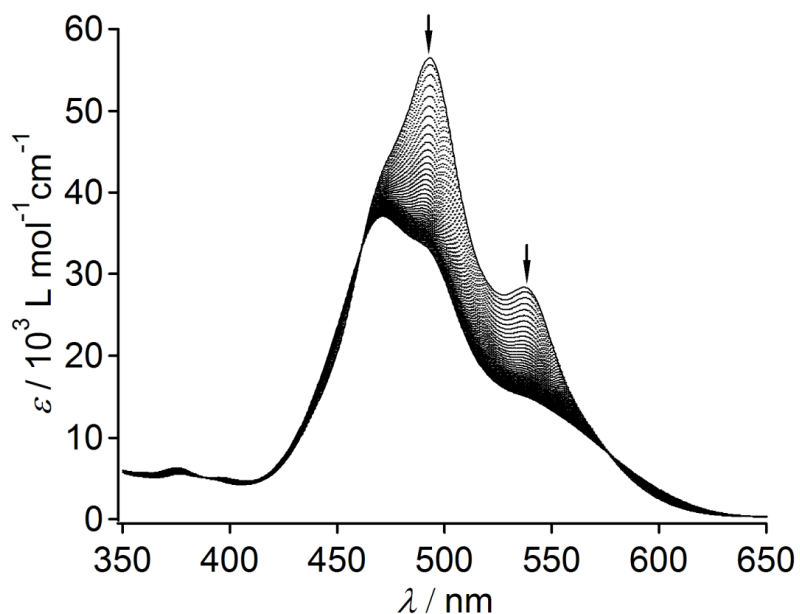

**Fig. S5** Time-dependent UV/Vis absorption spectra of **2** ( $c = 1 \times 10^{-4}$  M) in THF/water (60/40) mixture at 20 °C (1–300 min). Arrows indicate the spectral changes with time.

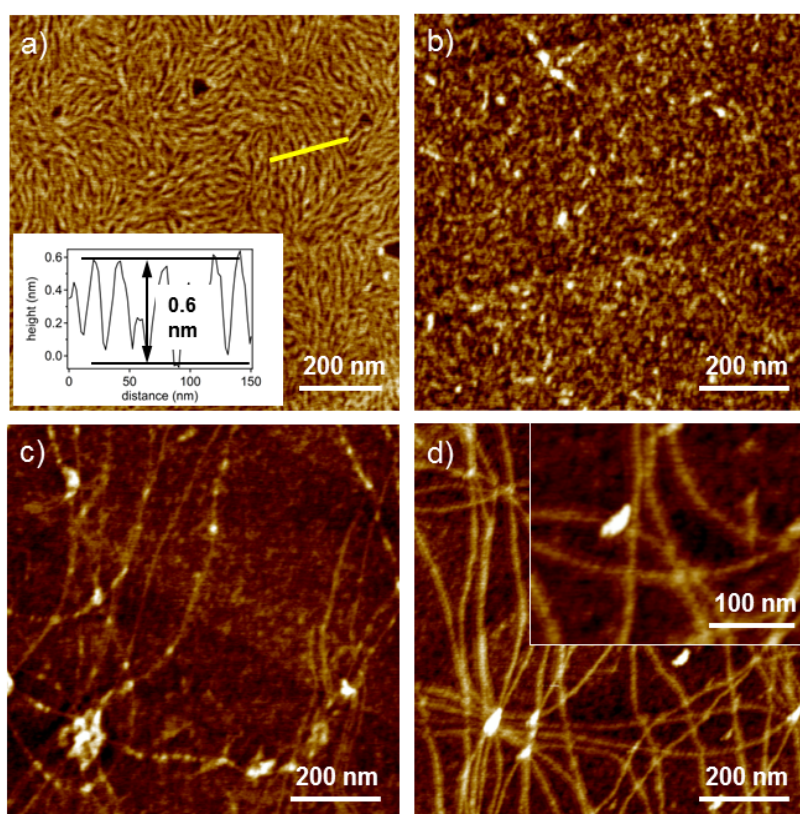

**Fig. S6** a) AFM height image of **2** spin-coated from THF solution ( $c = 1 \times 10^{-4}$  M) onto highly oriented pyrolytic graphite (HOPG). Inset: cross-sectional analysis along yellow line in a). b-d) AFM height images of **2** ( $c = 1 \times 10^{-4}$  M) spin-coated from THF/water (50/50) mixture after an equilibration time of b) 1 min, c) 5 min and d) 15 min.

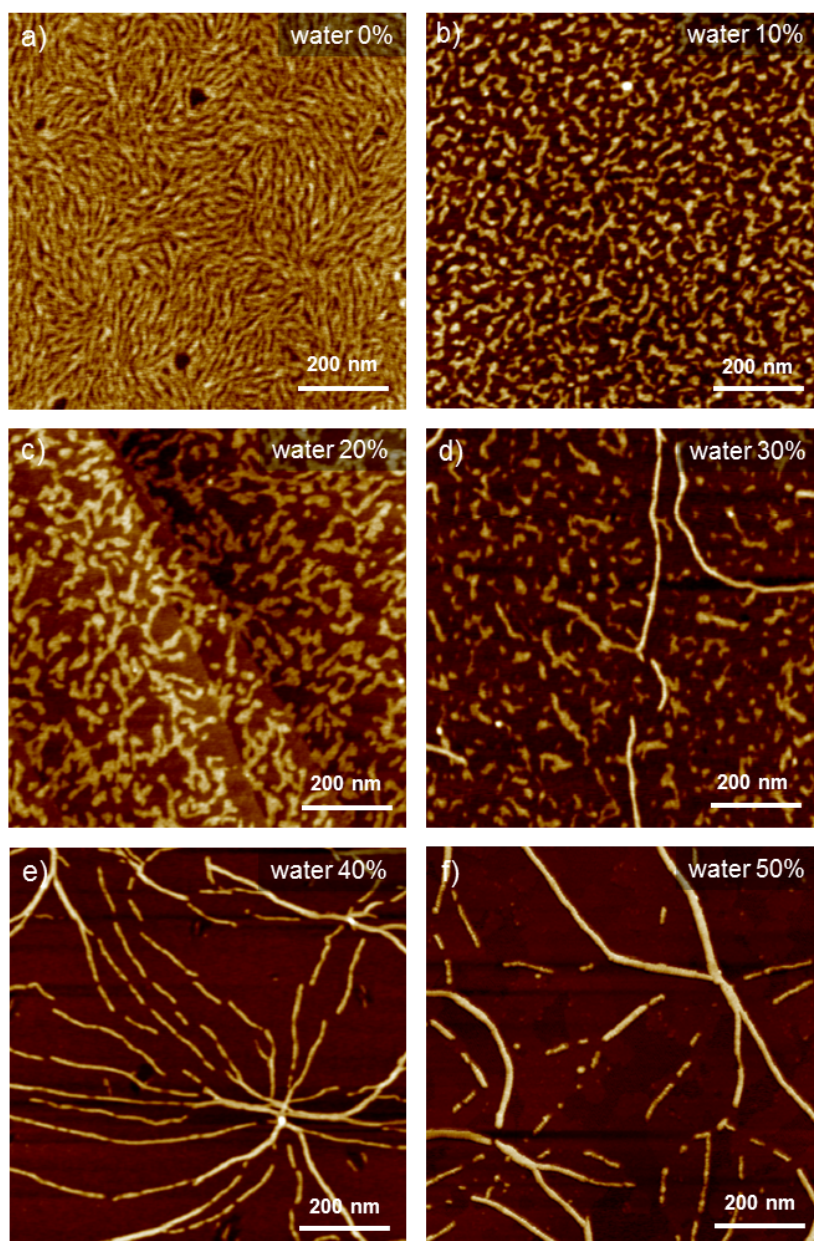

**Fig. S7** AFM height images of aggregated **2** ( $c = 1 \times 10^{-4}$  M) spin-coated from different THF/water mixtures onto HOPG. Water content: a) 0%, b) 10%, c) 20%, d) 30%, e) 40%, and f) 50%. The AFM imaging was carried out after 6 h of incubation.



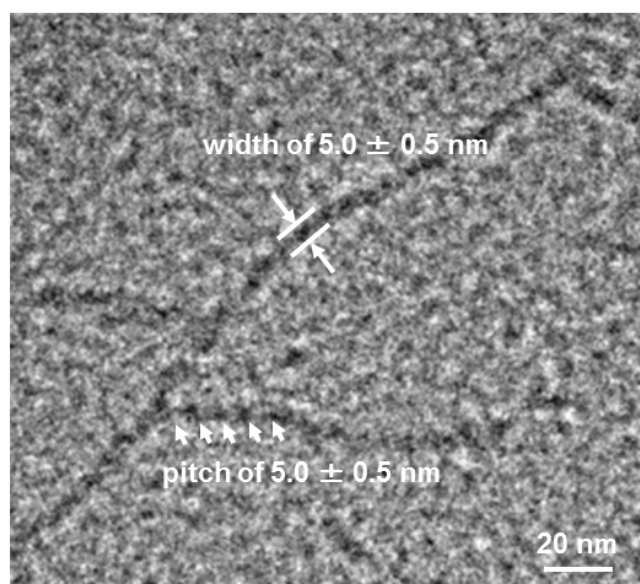

**Fig. S8** TEM image of helical supramolecular polymers of **2** formed in THF/water (50/50) mixture ( $c = 1 \times 10^{-4}$  M). The sample was prepared by spin-coating the solution onto carbon-coated formvar copper grid (200 mesh).

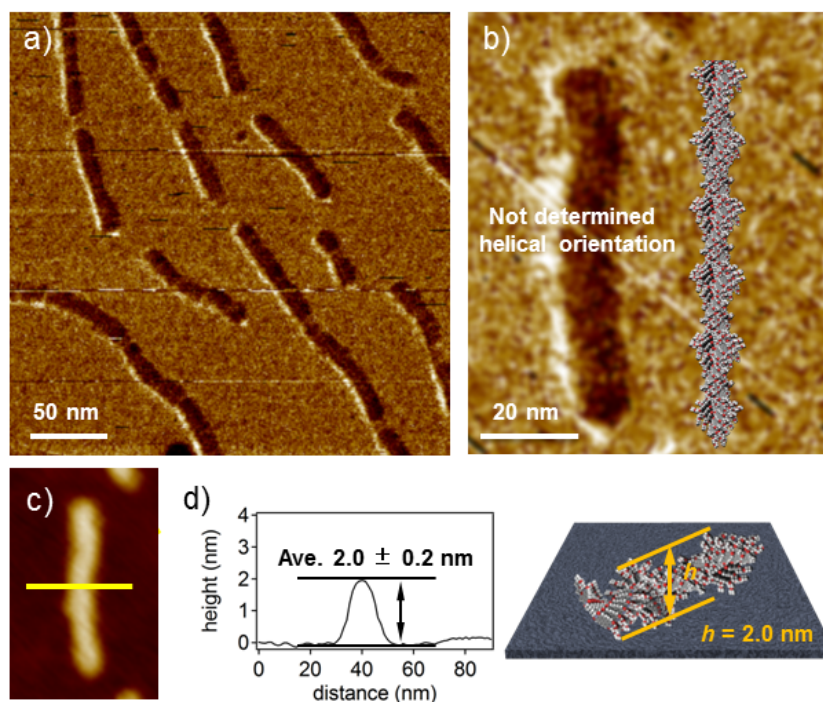

**Fig. S9** a) AFM phase image of **2** ( $c = 1 \times 10^{-4}$  M) spin-coated from THF/water (40/60) onto HOPG. b) Magnified image of a fiber with proposed aggregate structure. c) AFM height image of the fiber. d) Cross-sectional analysis along the yellow line in c) with schematic representation of the fiber on the substrate.

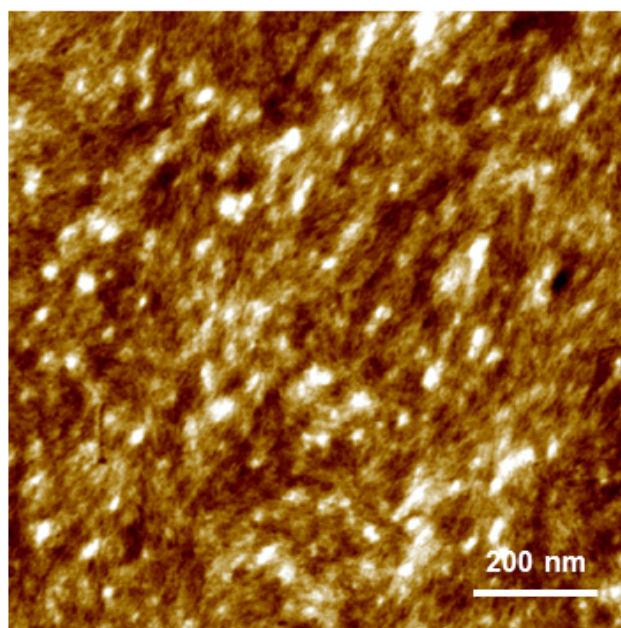

**Fig. S10** AFM height image of the precipitate formed in the supersaturated THF solution of **2** ( $c = 2 \times 10^{-4}$  M) spin-coated onto HOPG.

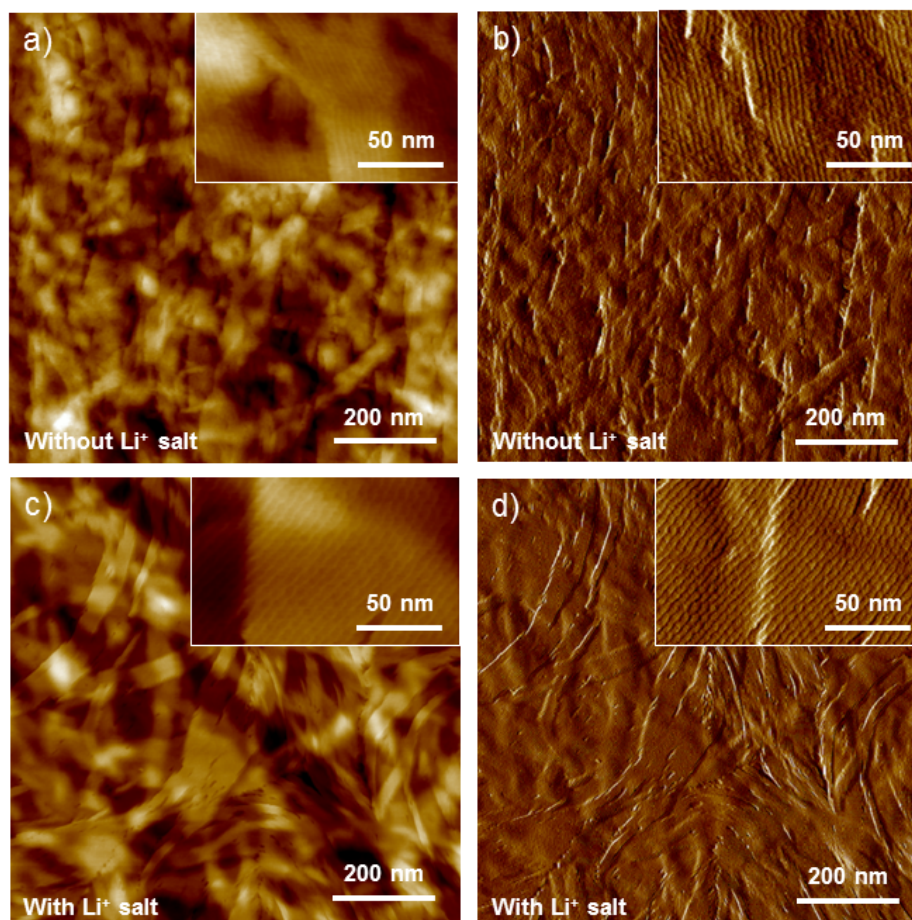

**Fig. S11** AFM a,c) height and b,d) error images of xerogels of **2** ( $c = 1.0 \times 10^{-3}$  M) a,b) without Li<sup>+</sup> salt and c,d) with Li<sup>+</sup> salt.

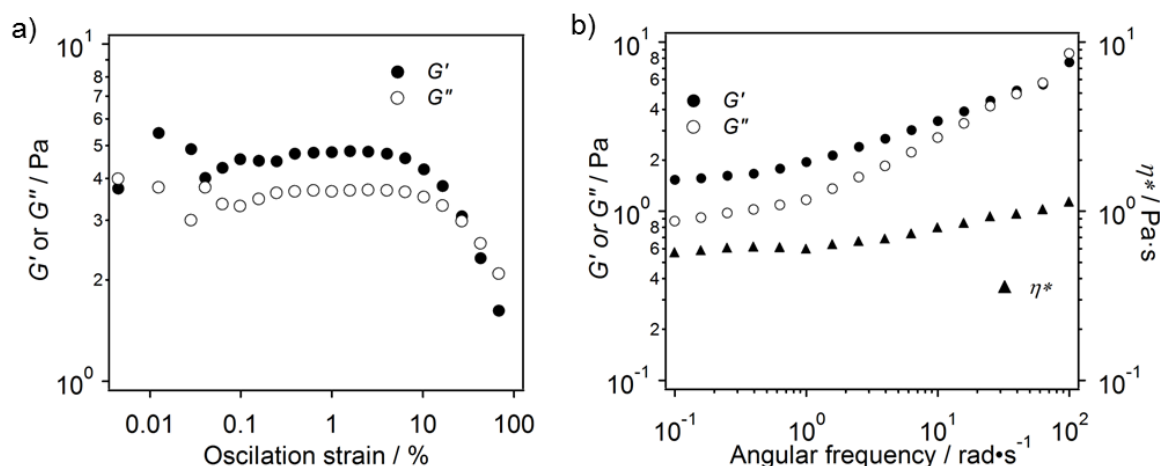

**Fig. S12** a) Dynamic moduli, storage modulus ( $G'$ ) and loss modulus ( $G''$ ), versus oscillation strain for a gel of **2** ( $c = 3.0 \times 10^{-3}$  M) in THF/ water (50/50) mixture. The data were acquired at 25 °C. b) Dynamic moduli, storage modulus ( $G'$ ), loss modulus ( $G''$ ), and complex viscosity ( $\eta^*$ ) versus angular frequency for a gel of **2** ( $c = 3.0 \times 10^{-3}$  M) in THF/water (50/50) mixture at 25 °C. Strain amplitude: 10%.

**Table S1**  $d$ -Spacing values and lattice parameters of dried gel of **2**.

| Assigned         | $d$ -spacing / Å | (hkl) | lattice parameters / Å |
|------------------|------------------|-------|------------------------|
| Col <sub>h</sub> | 25.5             | (100) | $a = 29.9$             |
|                  | 14.9             | (110) |                        |
|                  | 13.0             | (200) |                        |
|                  | 9.4              | (210) |                        |
|                  | 7.3              | (220) |                        |

The  $d$ -spacing ratio was found to be  $1:\frac{1}{\sqrt{3}}:\frac{1}{2}:\frac{1}{\sqrt{7}}:\frac{1}{3}:\frac{1}{\sqrt{12}}$  indicating a hexagonal columnar arrangement.

#### 4. Supporting References

S1 N. Pasaogullari, H. Icil and M. Demuth, *Dyes and Pigments*, 2006, **69**, 118–127.

S2 R. Samudrala, X. Zhang, R. M. Wadkins and D. L. Mattern, *Bioorg. Med. Chem.*, 2007, **15**, 186–193.

S3 A. Wicklein, A. Lang, M. Muth and M. Thelakkat, *J. Am. Chem. Soc.*, 2009, **131**, 14442–14453.
